# Supplementary material for: Hybrid system for rechargeable magnesium battery with high energy density
Source: PubMed Central journal article supplement (PMC4502397; doi:10.1038/srep11931), 2015-07-15
Supplement: srep11931-s1.pdf [file srep11931-s1.pdf]

## Electronic supporting information (ESI):

### Hybrid system for rechargeable magnesium battery with high energy density

Zheng Chang, Yaqiong Yang, Xiaowei Wang, Minxia Li, Zhengwen Fu, Yuping Wu\*, Rudolf Holze

#### 1. Physical characterization of the prepared $\text{LiFePO}_4$ .

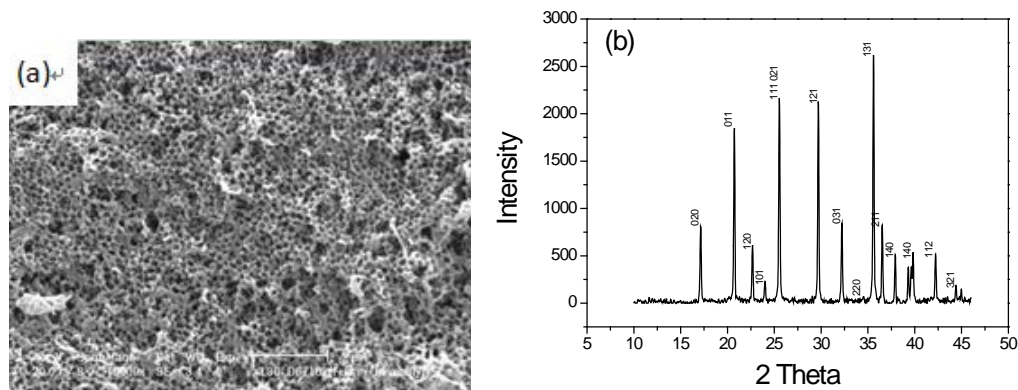

**Fig. S1.** (a) SEM and (b) X-ray diffraction pattern of  $\text{LiFePO}_4$ .

This 3D macroporous structure will facilitate the penetration of the aqueous electrolyte and give a large accessible surface area to enhance the exchange of  $\text{Li}^+$  between the aqueous electrolyte and the electrode. Moreover the XRD pattern of the 3D macroporous  $\text{LiFePO}_4$  can be well indexed to the pure  $\text{LiFePO}_4$  phase with an orthorhombic structure (JCPDS card no. 83-2092)

#### 2. Mg deposition/stripping Coulombic efficiency in PhMgBr and PhMgBr+LiBr electrolytes

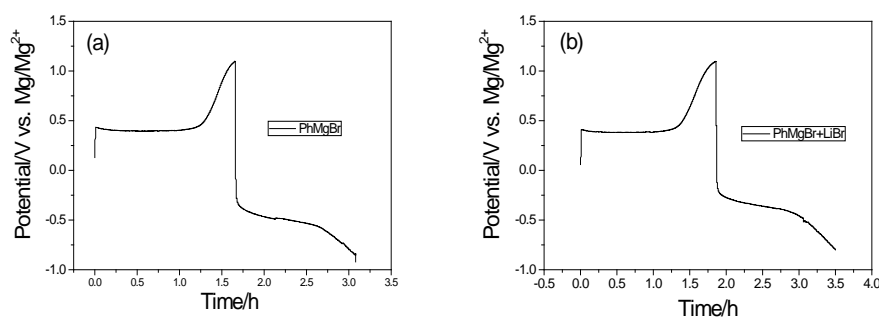

**Fig. S2** Typical galvanostatic curves for Mg deposition-dissolution on Cu substrate in 1 M PhMgBr/THF (a), PhMgBr + LiBr/THF (b)

According to the ratio of the charge amount of magnesium dissolution to that of magnesium deposition shown in the above figure, Mg deposition/stripping Coulombic Efficiency in PhMgBr and PhMgBr+LiBr electrolyte are calculated to be 85.5% and 88.2%, respectively.

#### 3. The electrochemical window of the organic electrolyte

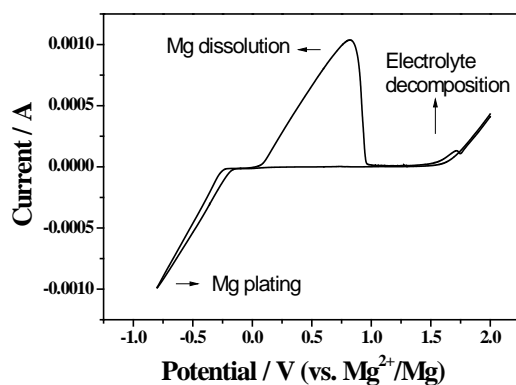

**Fig. S3** The typical steady-state voltammograms of Cu electrode in the Grignard reagent PhMgBr of THF solution.

The electrochemical window of this electrolyte is 1.5 V. Above 1.5 V, it begins to decompose.

#### 4. Calculation of the energy density assembled Mg//LiFePO<sub>4</sub> battery

Mg: 2200 mAh g<sup>-1</sup>

LiFePO<sub>4</sub>: 121.7 mAh g<sup>-1</sup>

Discharge Potential: 2.12V

The energy density is  $121.7 / (1 + 121.7/2200) \times 2.12 = 245 \text{ Wh kg}^{-1}$ .

#### 5. The potential change of Li<sup>+</sup> ions in the LISICON film

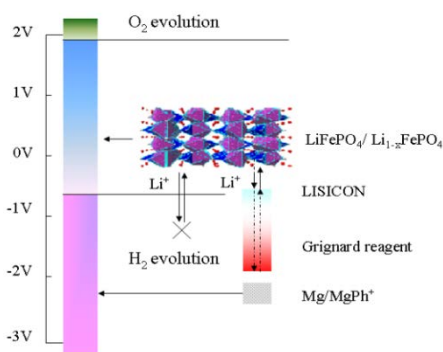

**Fig. S4** Schematic illustration of the potential change of Li<sup>+</sup> ions during the movement between the LiFePO<sub>4</sub> positive electrode in the aqueous electrolyte and the magnesium in the Grignard reagent-based electrolyte.

#### 6. Charge and discharge curves at different cycles for the rechargeable Mg battery

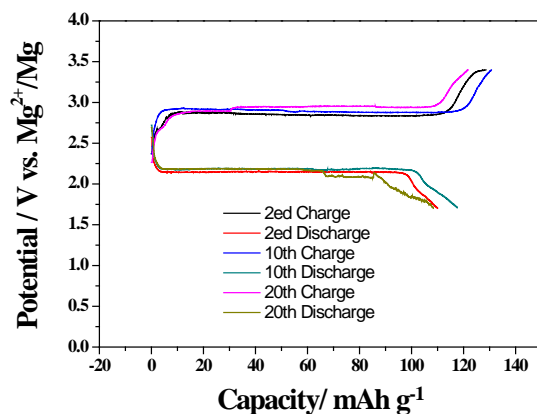

**Fig. S5** The charge and discharge curves in the second, tenth, twentieth cycles for the rechargeable Mg//LiFePO<sub>4</sub> battery.

**7. Calculation of the energy density based on Mg and LiCoO<sub>2</sub> on the basis of the theoretic data**

Mg: 2200 mAh g<sup>-1</sup>

LiCoO<sub>2</sub>: 145 mAh g<sup>-1</sup>

Potential difference: 0.95 - (-2.37) = 3.32 V

The energy density is  $145 / (1 + 145/2200) \times 3.32 = 451 \text{ Wh kg}^{-1}$ .
